# Supplementary material for: CROSSalive : a web server for predicting the in vivo structure of RNA molecules
Source: Oxford University Press journal article supplement (doi:10.1093/bioinformatics/btz666), 2019-08-27

**Supplementary Figure 1.** Distribution of *in vivo* vs *in vitro* icSHAPE scores along the entire murine transcriptome. Several regions are highly-variable, showing drastic changes from double- to single-stranded *in vivo* (score>0.5; d->s), or from single- to double-stranded (score<-0.5; s->d).

**Supplementary Figure 2.** Pipeline summarizing the process of filtering for protein contributions for m6a+ data.

**Supplementary Figure 3.** Pipeline summarizing the process of filtering for protein contributions for m6a- data.

**Supplementary Figure 4.** Cross-validation between neural networks trained on strong signal 100'000 icSHAPE fragments (equal size groups). The accuracy is reported for the 5% highest confidence set. Each comparison is done against the other datasets.

**Supplementary Table 1.** Complete list of proteins used in our analysis for m6a+. Proteins able to discriminate the RNA structure *in vivo* in double- single-stranded are highlighted in bold. The 101 protein isoforms used to build CROSSalive m6a+ are associated to their discriminative GO.

**Supplementary Table 2.** Complete list of proteins used in our analysis for m6a-. Proteins able to discriminate the RNA structure *in vivo* in double- single-stranded are highlighted in bold. The 81 protein isoforms used to build CROSSalive m6a- are associated to their discriminative GO.

# Figure 1

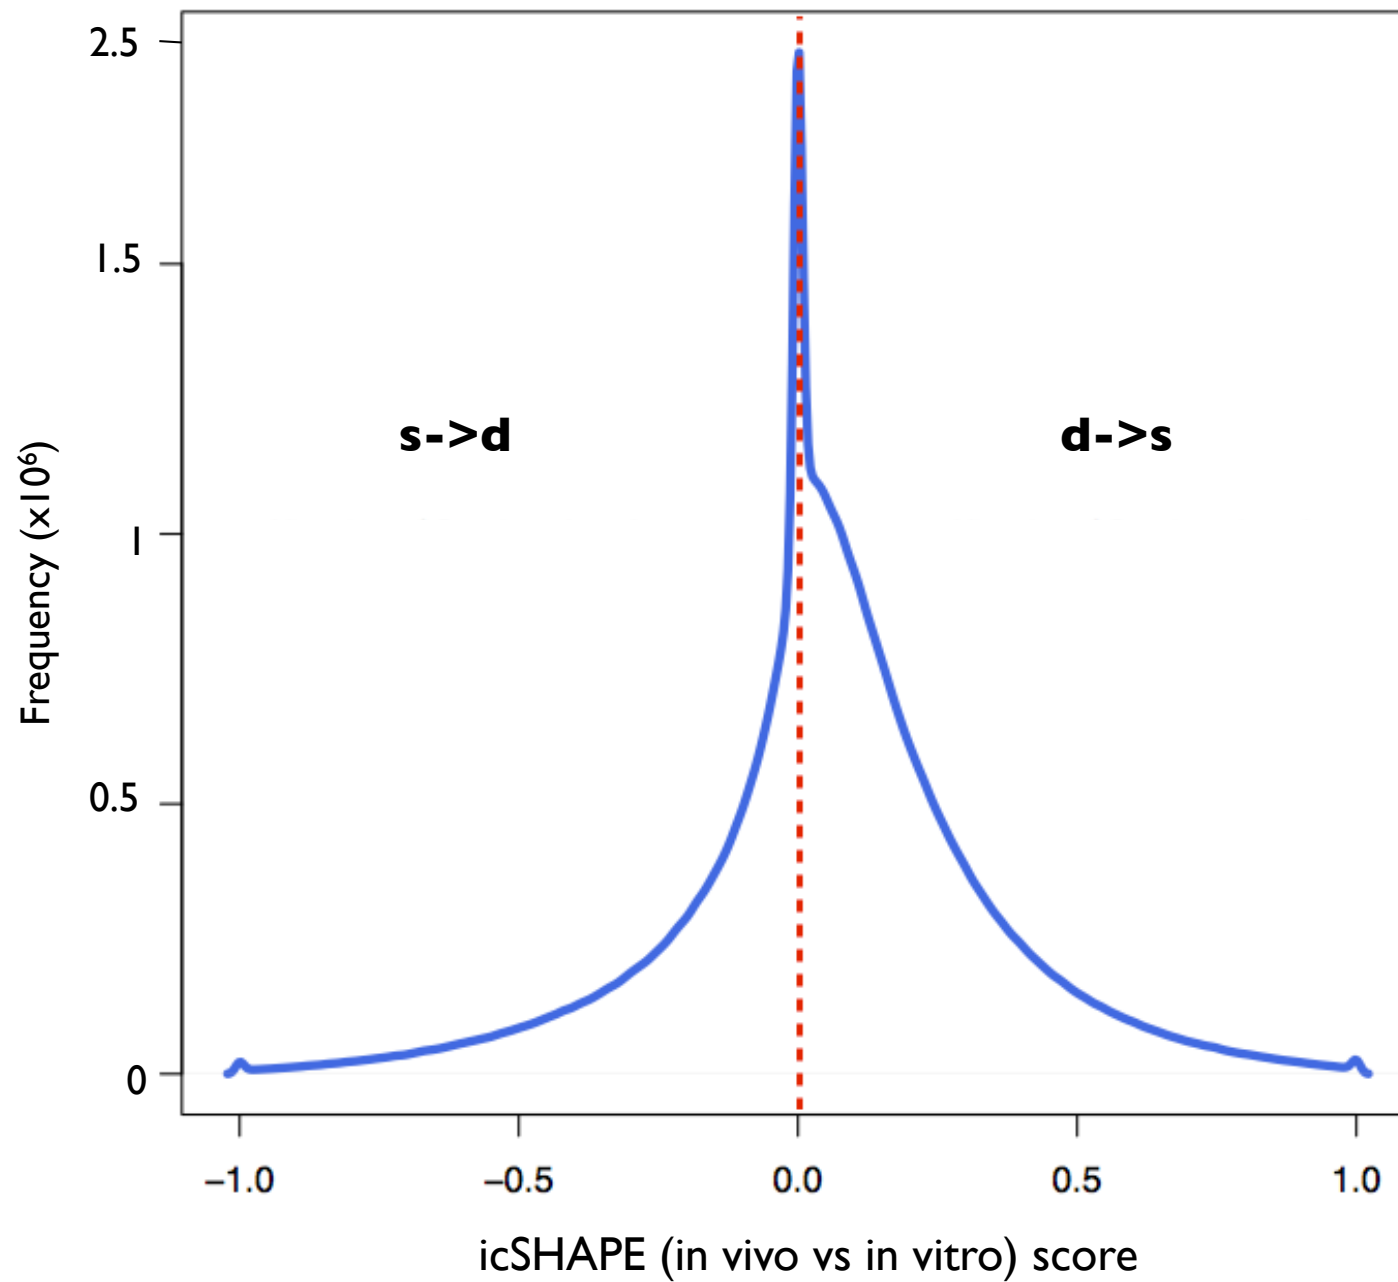

# Figure 2

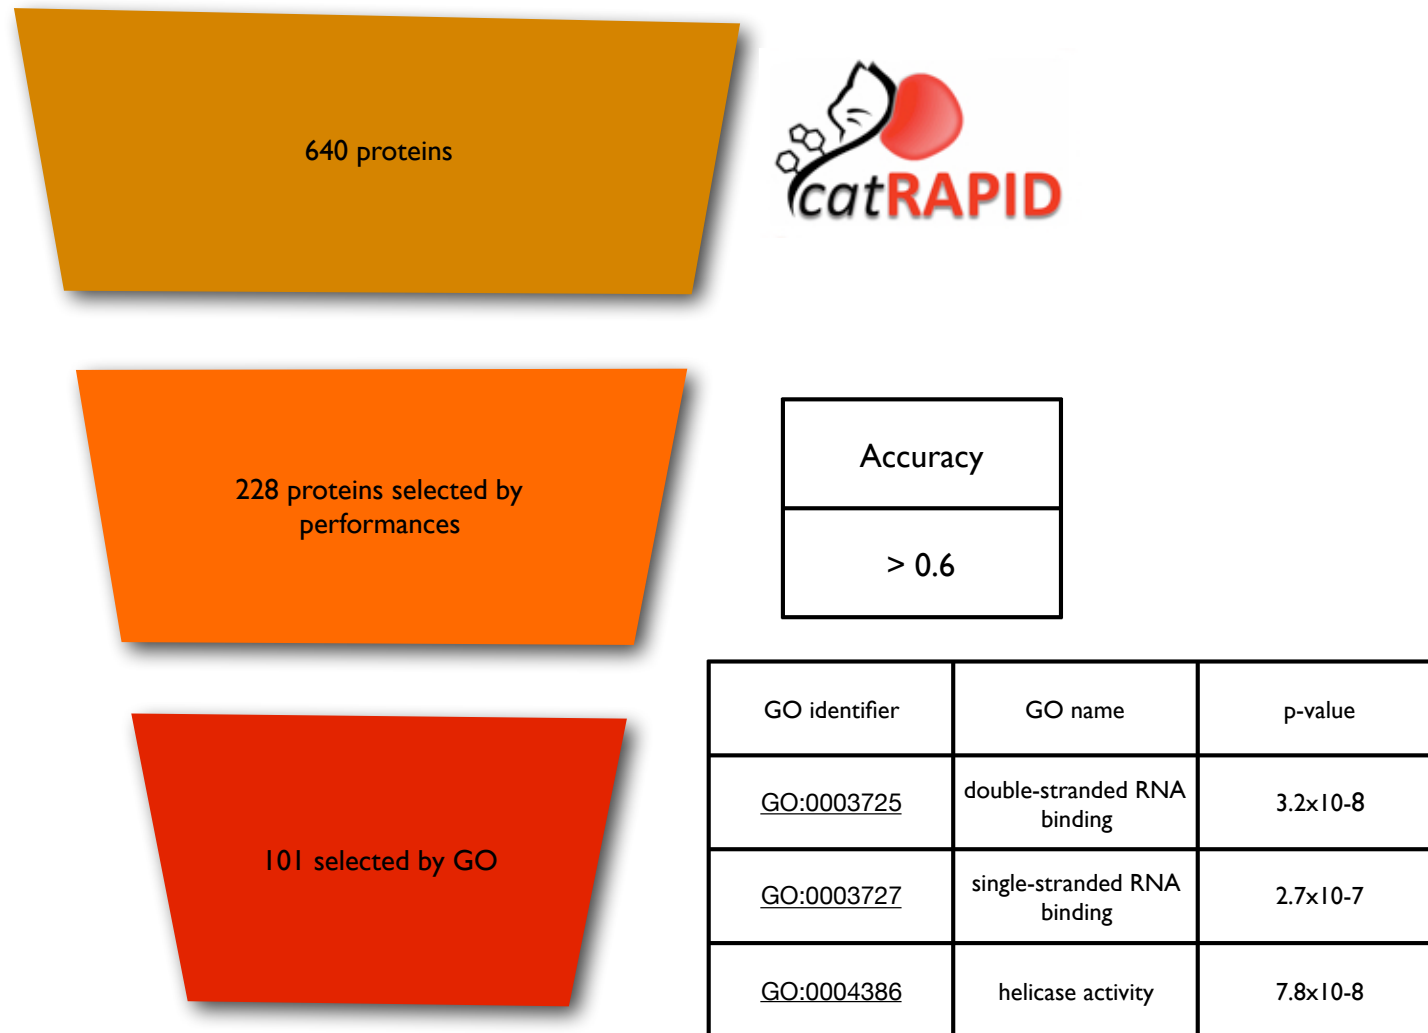

# Figure 3

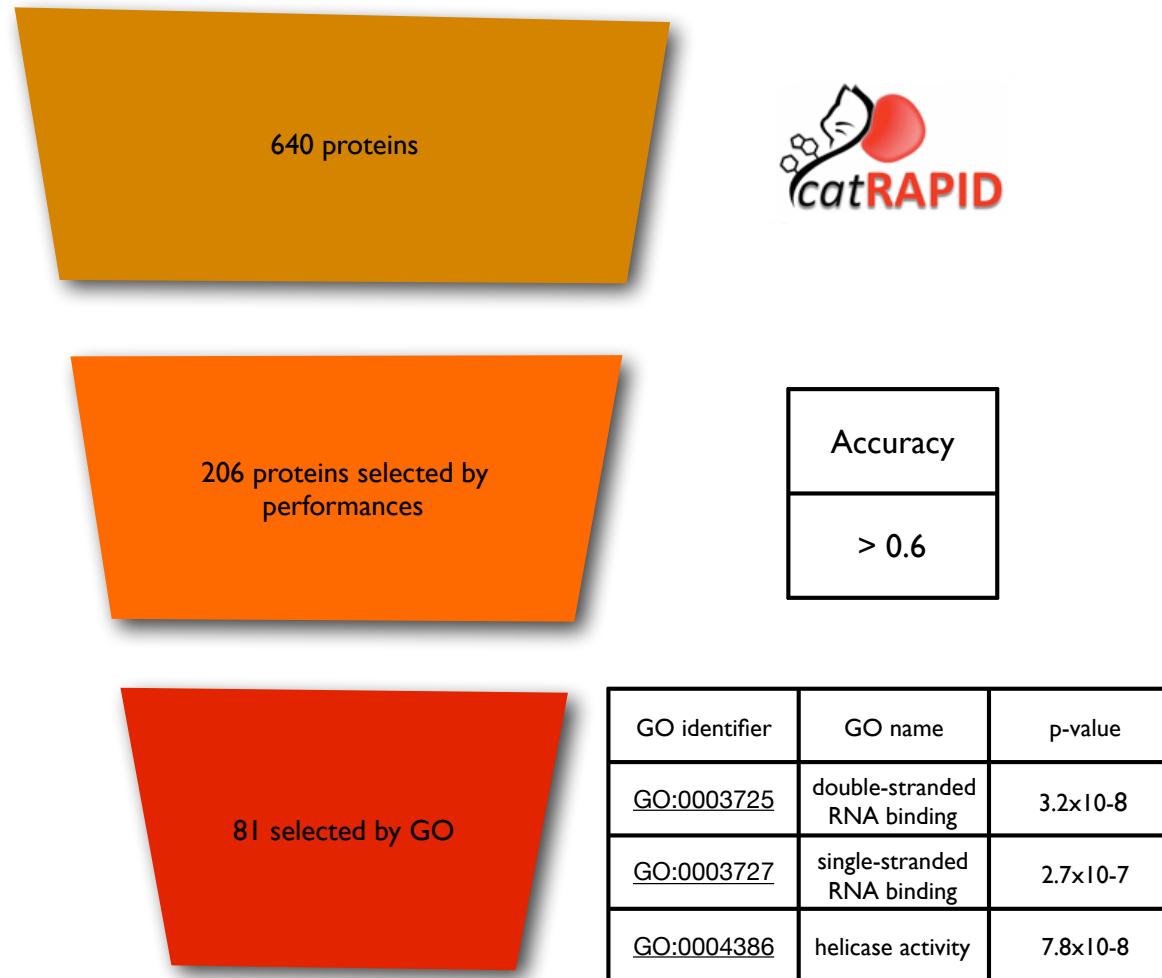

Figure 4

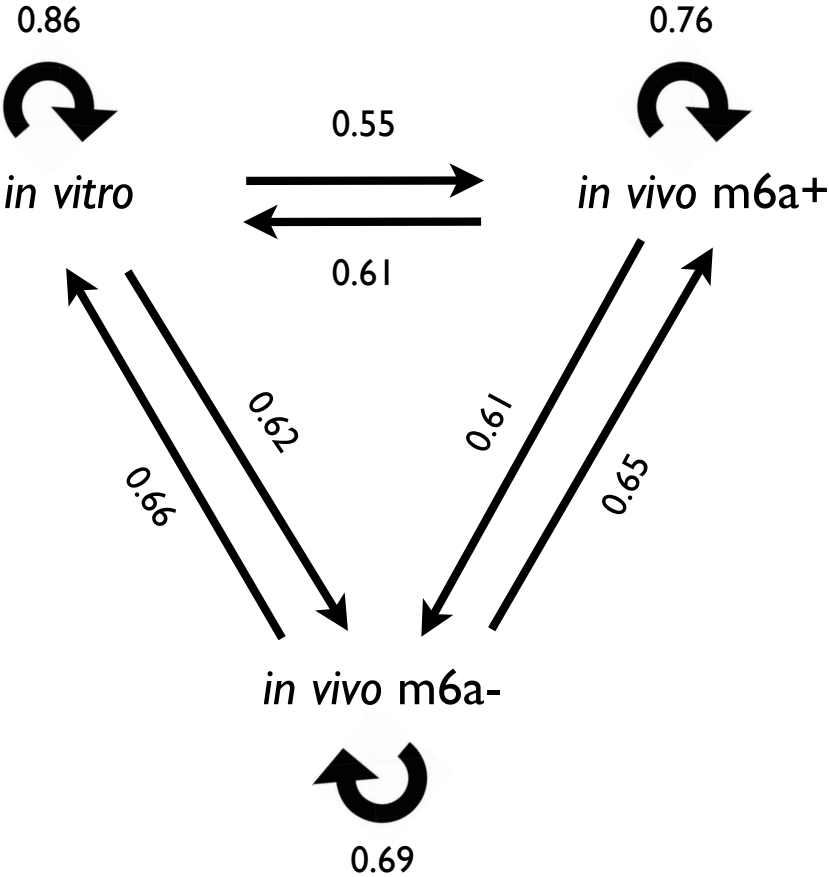

Supplement: bioinformatics_36_3_940_s2.zip [file bioinformatics_36_3_940_s2.zip]
