# Supplementary material for: CROSSalive : a web server for predicting the in vivo structure of RNA molecules
Source: Oxford University Press journal article supplement (doi:10.1093/bioinformatics/btz666), 2019-08-27
Supplement: bioinformatics_36_3_940_s2.zip [file bioinformatics_36_3_940_s2.zip]

Archive with 7 entries (7 files):
- supplementary-table-s2.xlsx
- BIOINF-2019-1105.supplementary.pdf
- proteins_m6a-.table.pdf
- proteins_m6a+table.pdf
- supplementary_figures_s1_s2_s3_s4.pdf
- supplementary_figures_s1_s2_s3_s4_tables_s1_s2.pdf
- supplementary_table_s1.xlsx
