# Supplementary material for: CROSSalive : a web server for predicting the in vivo structure of RNA molecules
Source: Oxford University Press journal article supplement (doi:10.1093/bioinformatics/btz666), 2019-08-27
Supplement: bioinformatics_36_3_940_s2.zip [file bioinformatics_36_3_940_s2.zip › proteins_m6a+table.pdf]

**A0A0J9YUD8** GO\_0003725;  
**A0A0J9YUZ4** GO\_0003725;  
A0A0J9YV17  
**A0A0J9YV76** GO\_0003725;  
**A0A0R4J2C3** GO\_0004386;GO\_0003725;  
A0A0U1RP30  
**A0A0U1RP90** GO\_0003727;GO\_0003725;  
A0A0U1RPG3  
**A0A1B0GS40** GO\_0003725;  
**A0A1L1SQR7** GO\_0003727;GO\_0004386;GO\_0003725;  
A0A1L1SU19  
**A2A5R8** GO\_0003725;  
**A2A5S3** GO\_0003725;  
**A2ADA5**  
A2AHI8  
**A2ARM1** GO\_0003727;  
A2BH69  
**A2RSY6** GO\_0003727;  
**B2RQL4**  
D3YVC6  
D3YXB2  
**D3YXD3** GO\_0003725;  
D3YY71  
D3YYK4  
D3YZ18  
D3YZ76  
**D3YZS5** GO\_0003725;  
**D3Z282** GO\_0003725;  
D3Z324  
**D3Z329** GO\_0003727;GO\_0003725;  
D3Z352  
**D3Z3B3** GO\_0003727;GO\_0004386;GO\_0003725;  
**D3Z461** GO\_0003725;  
D3Z4I3  
D3Z5F6  
**D3Z6D2** GO\_0003725;  
D6RCY4  
D6RE49  
D6RGR9  
**E0CXP1**  
E0CY94  
E0CYH6  
E0CYN4

|               |                        |
|---------------|------------------------|
| <b>E0CZ32</b> | GO_0003725;            |
| E0CZD3        |                        |
| <b>E2QRQ3</b> | GO_0003725;            |
| <b>E9PYN2</b> | GO_0003725;            |
| <b>E9Q326</b> | GO_0003725;            |
| <b>E9Q7N8</b> | GO_0003725;            |
| <b>E9Q9A9</b> | GO_0003725;            |
| F6VMV6        |                        |
| <b>F6WJA6</b> | GO_0003727;            |
| <b>F6X2V9</b> | GO_0003727;GO_0003725; |
| F6Y3A6        |                        |
| F7ATT9        |                        |
| <b>F7CFL3</b> | GO_0003725;            |
| <b>F7CTY2</b> | GO_0003725;            |
| <b>F7CXR7</b> | GO_0003725;            |
| <b>F8WHN2</b> | GO_0003727;            |
| <b>F8WI80</b> |                        |
| G3X9Q0        |                        |
| G8JL83        |                        |
| H3BK45        |                        |
| <b>H9KV02</b> |                        |
| <b>O08583</b> |                        |
| <b>O08795</b> |                        |
| <b>O08848</b> |                        |
| <b>O35130</b> |                        |
| <b>O35326</b> |                        |
| O35473        |                        |
| <b>O35698</b> |                        |
| <b>O35737</b> |                        |
| O35900        |                        |
| <b>O54724</b> |                        |
| <b>O54836</b> |                        |
| <b>O55055</b> |                        |
| O55187        |                        |
| <b>O88477</b> |                        |
| <b>O88569</b> |                        |
| <b>O89086</b> | GO_0003725;            |
| <b>P00375</b> |                        |
| <b>P05213</b> |                        |
| <b>P09405</b> | GO_0003727;GO_0004386; |
| POC7A0        |                        |
| <b>POC7T6</b> |                        |
| <b>P10107</b> | GO_0003725;            |

|               |             |
|---------------|-------------|
| <b>P10630</b> | GO_0003725; |
| <b>P10852</b> | GO_0003725; |
| <b>P11260</b> |             |
| <b>P11499</b> |             |
| <b>P11928</b> |             |
| <b>P14148</b> |             |
| <b>P14576</b> |             |
| P16254        |             |
| <b>P16330</b> |             |
| <b>P16381</b> | GO_0003725; |
| <b>P17225</b> |             |
| <b>P17433</b> |             |
| <b>P19426</b> |             |
| <b>P20152</b> |             |
| P21570        |             |
| <b>P22561</b> | GO_0003725; |
| <b>P23949</b> |             |
| <b>P24547</b> |             |
| <b>P25444</b> |             |
| <b>P26041</b> |             |
| <b>P26369</b> | GO_0003727; |
| <b>P27048</b> |             |
| <b>P28352</b> |             |
| <b>P28659</b> |             |
| <b>P29341</b> | GO_0003727; |
| <b>P31230</b> |             |
| P32067        |             |
| <b>P35550</b> |             |
| <b>P35922</b> |             |
| P35979        |             |
| <b>P40764</b> | GO_0003725; |
| P47199        |             |
| <b>P47962</b> |             |
| <b>P49312</b> |             |
| P49962        |             |
| <b>P50580</b> | GO_0003727; |
| <b>P52196</b> |             |
| <b>P52912</b> |             |
| <b>P53026</b> |             |
| <b>P53996</b> | GO_0003727; |
| <b>P54823</b> |             |
| <b>P56959</b> |             |
| <b>P57722</b> |             |

|               |                        |
|---------------|------------------------|
| <b>P57724</b> |                        |
| <b>P57784</b> | GO_0004386;GO_0003725; |
| P59708        |                        |
| <b>P60322</b> |                        |
| P60324        |                        |
| <b>P60335</b> |                        |
| <b>P60824</b> |                        |
| <b>P60843</b> | GO_0003725;            |
| <b>P60867</b> |                        |
| <b>P61327</b> |                        |
| <b>P61979</b> |                        |
| P62264        |                        |
| P62270        |                        |
| P62281        |                        |
| <b>P62305</b> |                        |
| <b>P62307</b> |                        |
| P62309        |                        |
| P62311        |                        |
| P62313        |                        |
| P62320        |                        |
| P62322        |                        |
| P62488        |                        |
| <b>P62702</b> |                        |
| P62751        |                        |
| P62843        |                        |
| <b>P62908</b> | GO_0003725;            |
| <b>P62918</b> | GO_0003727;            |
| <b>P62960</b> |                        |
| <b>P62996</b> |                        |
| <b>P63038</b> |                        |
| <b>P63058</b> |                        |
| P63073        |                        |
| <b>P63154</b> |                        |
| <b>P63158</b> | GO_0003725;            |
| <b>P63163</b> |                        |
| <b>P63242</b> |                        |
| P63271        |                        |
| P67984        |                        |
| P68372        |                        |
| <b>P70122</b> |                        |
| <b>P70166</b> | GO_0003725;            |
| <b>P70279</b> |                        |
| <b>P70318</b> |                        |

|               |                        |
|---------------|------------------------|
| <b>P70333</b> |                        |
| <b>P70372</b> |                        |
| P84104        |                        |
| P85965        |                        |
| <b>P86049</b> | GO_0003725;            |
| <b>P97343</b> |                        |
| <b>P97379</b> |                        |
| <b>P97440</b> |                        |
| P97461        |                        |
| <b>P97473</b> | GO_0003725;            |
| <b>P97770</b> | GO_0003725;            |
| P97801        |                        |
| <b>P97855</b> |                        |
| <b>Q00899</b> |                        |
| <b>Q03160</b> | GO_0003725;            |
| <b>Q03963</b> |                        |
| <b>Q05921</b> |                        |
| <b>Q05A36</b> |                        |
| <b>Q05BJ7</b> | GO_0003725;            |
| <b>Q05BR6</b> | GO_0004386;GO_0003725; |
| <b>Q05CL8</b> | GO_0003725;            |
| <b>Q149F1</b> |                        |
| <b>Q14A90</b> | GO_0003727;GO_0003725; |
| <b>Q14AI6</b> | GO_0003725;            |
| Q14AZ4        |                        |
| <b>Q14BH3</b> | GO_0003725;            |
| <b>Q14C51</b> | GO_0003725;            |
| <b>Q3T997</b> | GO_0003725;            |
| <b>Q3T9H2</b> | GO_0003725;            |
| Q3TEB2        |                        |
| Q3THJ3        |                        |
| <b>Q3TJ07</b> | GO_0003725;            |
| <b>Q3TU43</b> | GO_0003725;            |
| <b>Q3TWA1</b> | GO_0003725;            |
| <b>Q3TWP5</b> | GO_0003725;            |
| <b>Q3TX08</b> | GO_0003725;            |
| <b>Q3TZX8</b> | GO_0003725;            |
| <b>Q3U0V1</b> |                        |
| <b>Q3U5F4</b> |                        |
| <b>Q3U7A6</b> | GO_0003725;            |
| <b>Q3U8D3</b> | GO_0003725;            |
| <b>Q3U9C4</b> |                        |
| <b>Q3UBZ5</b> |                        |

|               |                                   |
|---------------|-----------------------------------|
| <b>Q3UD30</b> | GO_0003727;GO_0004386;GO_0003725; |
| <b>Q3UDH2</b> |                                   |
| <b>Q3UE17</b> | GO_0003725;                       |
| <b>Q3UEB3</b> |                                   |
| <b>Q3UK98</b> | GO_0003727;GO_0003725;            |
| <b>Q3UKG1</b> |                                   |
| <b>Q3UKX3</b> | GO_0003725;                       |
| <b>Q3UMQ8</b> |                                   |
| <b>Q3UNH9</b> | GO_0003725;                       |
| <b>Q3UR42</b> | GO_0004386;GO_0003725;            |
| <b>Q3URQ7</b> | GO_0003725;                       |
| <b>Q3US41</b> | GO_0004386;GO_0003725;            |
| <b>Q3UTA9</b> |                                   |
| <b>Q3UTC8</b> | GO_0003725;                       |
| <b>Q3UUK2</b> | GO_0003727;                       |
| <b>Q3UUV8</b> |                                   |
| <b>Q3UWR2</b> |                                   |
| <b>Q3UWZ6</b> |                                   |
| <b>Q3UXA2</b> |                                   |
| <b>Q3UY54</b> | GO_0003725;                       |
| <b>Q3UZ01</b> | GO_0003725;                       |
| <b>Q3V188</b> | GO_0003727;GO_0004386;            |
| <b>Q45KJ6</b> |                                   |
| <b>Q45VK5</b> | GO_0003727;GO_0004386;GO_0003725; |
| <b>Q45VK6</b> | GO_0003727;GO_0004386;GO_0003725; |
| <b>Q4FJV4</b> | GO_0003725;                       |
| <b>Q4FZF3</b> | GO_0003727;                       |
| <b>Q4KL78</b> |                                   |
| <b>Q501J6</b> | GO_0004386;GO_0003725;            |
| <b>Q505F5</b> |                                   |
| <b>Q52KJ2</b> | GO_0003725;                       |
| <b>Q569X3</b> |                                   |
| <b>Q58EV5</b> | GO_0003725;                       |
| <b>Q5F2A7</b> | GO_0003725;                       |
| <b>Q5F2E7</b> | GO_0003727;                       |
| <b>Q5FWJ3</b> |                                   |
| <b>Q5J3Q7</b> |                                   |
| <b>Q5J4D4</b> | GO_0003725;                       |
| <b>Q5J4D5</b> | GO_0003725;                       |
| <b>Q5NCR9</b> |                                   |
| <b>Q5ND52</b> | GO_0003727;                       |
| <b>Q5QJQ9</b> | GO_0003727;                       |
| <b>Q5SF07</b> |                                   |

|        |                        |
|--------|------------------------|
| Q5SUE7 |                        |
| Q5U4D9 | GO_0003727;            |
| Q5XFR0 | GO_0003725;            |
| Q5YD48 |                        |
| Q60668 |                        |
| Q60710 |                        |
| Q60749 |                        |
| Q60856 |                        |
| Q60865 | GO_0003727;            |
| Q60899 |                        |
| Q60900 |                        |
| Q60990 |                        |
| Q61066 |                        |
| Q61183 |                        |
| Q61474 |                        |
| Q61545 |                        |
| Q61584 |                        |
| Q61655 |                        |
| Q61656 |                        |
| Q61701 | GO_0003727;GO_0004386; |
| Q61823 |                        |
| Q61937 |                        |
| Q61990 |                        |
| Q62093 |                        |
| Q62095 |                        |
| Q62167 |                        |
| Q62176 | GO_0003725;            |
| Q62189 |                        |
| Q62191 |                        |
| Q62241 |                        |
| Q62348 |                        |
| Q62376 |                        |
| Q62377 |                        |
| Q64012 |                        |
| Q641P2 | GO_0003725;            |
| Q64213 |                        |
| Q64282 |                        |
| Q64368 |                        |
| Q64707 |                        |
| Q69Z36 |                        |
| Q6A0A2 |                        |
| Q6A0D4 |                        |
| Q6NVF9 |                        |

Q6NXK5  
Q6P3D0  
Q6P9R1  
Q6PB89  
Q6PCL9  
Q6PDM2  
Q6PEE2  
Q6PFR5  
Q6TNG5  
Q6VY05  
Q6ZPL9  
Q6ZWM4  
Q6ZWN5  
Q6ZWX6  
Q71LX8  
Q78E06  
Q7TMF2  
Q7TMK9  
Q7TMY4  
Q7TN33  
Q7TN98  
Q7TN99  
Q7TND5  
Q7TPD6  
Q7TPY2  
Q7TQC5  
Q7TQK4  
Q7TS68  
Q7TSY6  
Q80UU5  
Q80VC6  
Q80VL1  
Q80VT1  
Q80W37  
Q80WJ7  
Q80WS3  
Q80WY3  
Q80X85  
Q80Y20  
Q80YT9  
Q811K8  
Q812E0  
Q8BG05

Q8BG17  
Q8BG81  
Q8BGA5  
Q8BGD9  
Q8BGJ9  
Q8BGT7  
Q8BGW5  
Q8BGY2  
Q8BHD7  
Q8BHN5  
Q8BHS3  
Q8BI72  
Q8BIF2  
Q8BIQ5  
Q8BJ05  
Q8BKA3  
Q8BKS9  
Q8BKT7  
Q8BL97  
Q8BM30  
Q8BMA6  
Q8BMB3  
Q8BMC4  
Q8BN59  
Q8BNV1  
Q8BP71  
Q8BQZ3  
Q8BQZ5  
Q8BT14  
Q8BTF8  
Q8BTV2  
Q8BTW3  
Q8BUV6  
Q8BVL9  
Q8BVN4  
Q8BWL5  
Q8BWW4  
Q8BY02  
Q8BYL4  
Q8BZ06  
Q8C0D0  
Q8C181  
Q8C2Q3

Q8C2W3  
Q8C3P7  
Q8C551  
Q8C5B7  
Q8C5L7  
Q8C5Q4  
Q8C7E9  
Q8C7Q4  
Q8C854  
Q8C9A2  
Q8CAE2  
Q8CB98  
Q8CCF0  
Q8CCS6  
Q8CE46  
Q8CH02  
Q8CH72  
Q8CIN6  
Q8CJ67  
Q8CJ74  
Q8JZV4  
Q8JZX4  
Q8K0G8  
Q8K1J6  
Q8K234  
Q8K2D3  
Q8K2F8  
Q8K2X2  
Q8K301  
Q8K339  
Q8K363  
Q8K3L4  
Q8K3L5  
Q8K3P5  
Q8K3W3  
Q8K3Y3  
Q8K465  
Q8K469  
Q8K4B5  
Q8K4E6  
Q8K4E7  
Q8K4E8  
Q8K4E9

Q8QZX5  
Q8QZY9  
Q8R081  
Q8R0F5  
Q8R316  
Q8R326  
Q8R3G1  
Q8R3J4  
Q8R3N6  
Q8VBV3  
Q8VC51  
Q8VC70  
Q8VC85  
Q8VCZ8  
Q8VDG3  
Q8VDS3  
Q8VE62  
Q8VE80  
Q8VE92  
Q8VE97  
Q8VEH7  
Q8VH51  
Q8VHT7  
Q8VHZ7  
Q8VI94  
Q8VI95  
Q8VI96  
Q8VI97  
Q8VIJ6  
Q91V81  
Q91VC3  
Q91VE6  
Q91VI2  
Q91VM5  
Q91VN6  
Q91VR5  
Q91W18  
Q91W45  
Q91W59  
Q91WE3  
Q91WG3  
Q91WJ8  
Q91WM1

Q91WM3  
Q91WQ3  
Q91WT4  
Q91WT8  
Q91YM7  
Q91YN2  
Q91YQ3  
Q91Z31  
Q91Z49  
Q91ZS8  
Q920Q6  
Q921F0  
Q921F2  
Q921F4  
Q921I9  
Q921Y2  
Q924M5  
Q924S2  
Q99020  
Q99J10  
Q99J25  
Q99J36  
Q99J64  
Q99J87  
Q99JX7  
Q99K48  
Q99KR3  
Q99LX0  
Q99M28  
Q99MJ9  
Q99N87  
Q99N96  
Q9CPN8  
Q9CPS7  
Q9CQ21  
Q9CQ49  
Q9CQ61  
Q9CQE3  
Q9CQF3  
Q9CQF4  
Q9CQI7  
Q9CQK3  
Q9CQL1

Q9CQL5  
Q9CQQ8  
Q9CQS7  
Q9CQT2  
Q9CQY2  
Q9CR08  
Q9CR83  
Q9CR86  
Q9CRA8  
Q9CRB2  
Q9CTG2  
Q9CVW0  
Q9CW46  
Q9CWE6  
Q9CWT6  
Q9CWU5  
Q9CWV6  
Q9CWX4  
Q9CWX9  
Q9CWY8  
Q9CWZ3  
Q9CX86  
Q9CXG3  
Q9CXJ1  
Q9CXK8  
Q9CXW4  
Q9CXY6  
Q9CY57  
Q9CY58  
Q9CY66  
Q9CY73  
Q9CYC6  
Q9CZ96  
Q9CZB3  
Q9CZU4  
Q9CZX5  
Q9D0B0  
Q9D0D3  
Q9D0D4  
Q9D0E1  
Q9D0L8  
Q9D0M0  
Q9D0R4

Q9D0T1  
Q9D1C9  
Q9D1J3  
Q9D1N9  
Q9D1Q1  
Q9D384  
Q9D3U0  
Q9D5P4  
Q9D6V8  
Q9D753  
Q9D7A6  
Q9D7B1  
Q9D823  
Q9D824  
Q9D883  
Q9D8T7  
Q9D8Z1  
Q9DAA6  
Q9DAT5  
Q9DB27  
Q9DBB5  
Q9DBE7  
Q9DBN9  
Q9DBY5  
Q9ERI5  
Q9ESX4  
Q9ESX5  
Q9JHI2  
Q9JHI7  
Q9JHS9  
Q9JI20  
Q9JI38  
Q9JII5  
Q9JJ43  
Q9JJ48  
Q9JJT9  
Q9JJW6  
Q9JKB3  
Q9JKN6  
Q9JKP5  
Q9JL16  
Q9JLZ3  
Q9QUM9

Q9QXA5  
Q9QXK7  
Q9QXV1  
Q9QXX8  
Q9QY15  
Q9QY24  
Q9QYL7  
Q9QYS9  
Q9QZH3  
Q9R020  
Q9R0B7  
Q9R0U0  
Q9R226  
Q9WTX2  
Q9WU01  
Q9WU56  
Q9WUA2  
Q9WUK2  
Q9WV02  
Q9WVB0  
Q9WVP6  
Q9WVR4  
Q9Z0H4  
Q9Z108  
Q9Z120  
Q9Z130  
Q9Z199  
Q9Z1D1  
Q9Z1N5  
Q9Z204  
Q9Z2C8  
Q9Z2F2  
Q9Z2X1  
V5IRT6  
V9GX87
