# Supplementary material for: CROSSalive : a web server for predicting the in vivo structure of RNA molecules
Source: Oxford University Press journal article supplement (doi:10.1093/bioinformatics/btz666), 2019-08-27
Supplement: bioinformatics_36_3_940_s2.zip [file bioinformatics_36_3_940_s2.zip › proteins_m6a-.table.pdf]

A0A0J9YUD8  
A0A0J9YUZ4  
**A0A0J9YV17** GO\_0003725;  
**A0A0J9YV76** GO\_0003725;  
**A0A0R4J2C3** GO\_0003725;GO\_0004386;  
A0A0U1RP30  
A0A0U1RP90  
A0A0U1RPG3  
A0A1B0GS40  
A0A1L1SQR7  
A0A1L1SU19  
A2A5R8  
A2A5S3  
A2ADA5  
A2AHI8  
A2ARM1  
A2BH69  
**A2RSY6**  
B2RQL4  
D3YVC6  
D3YXB2  
D3YXD3  
D3YY71  
**D3YYK4** GO\_0003727;  
D3YZ18  
D3YZ76  
D3YZS5  
D3Z282  
D3Z324  
D3Z329  
D3Z352  
**D3Z3B3** GO\_0003727;  
D3Z461  
D3Z4I3  
**D3Z5F6** GO\_0003727;  
D3Z6D2  
D6RCY4  
D6RE49  
D6RGR9  
E0CXP1  
E0CY94  
E0CYH6  
E0CYN4

|               |                                   |
|---------------|-----------------------------------|
| E0CZ32        |                                   |
| E0CZD3        |                                   |
| E2QRQ3        |                                   |
| E9PYN2        |                                   |
| <b>E9Q326</b> | GO_0003725;                       |
| E9Q7N8        |                                   |
| E9Q9A9        |                                   |
| F6VMV6        |                                   |
| <b>F6WJA6</b> | GO_0003727;                       |
| F6X2V9        |                                   |
| F6Y3A6        |                                   |
| F7ATT9        |                                   |
| F7CFL3        |                                   |
| F7CTY2        |                                   |
| F7CXR7        |                                   |
| <b>F8WHN2</b> | GO_0003727;                       |
| F8WI80        |                                   |
| G3X9Q0        |                                   |
| G8JL83        |                                   |
| <b>H3BK45</b> | GO_0003727;                       |
| H9KV02        |                                   |
| O08583        |                                   |
| O08795        |                                   |
| O08848        |                                   |
| O35130        |                                   |
| O35326        |                                   |
| O35473        |                                   |
| O35698        |                                   |
| O35737        |                                   |
| O35900        |                                   |
| O54724        |                                   |
| O54836        |                                   |
| <b>O55055</b> | GO_0003725;                       |
| <b>O55187</b> | GO_0003727;                       |
| O88477        |                                   |
| O88569        |                                   |
| O89086        |                                   |
| <b>P00375</b> | GO_0003725;GO_0003727;GO_0004386; |
| P05213        |                                   |
| P09405        |                                   |
| P0C7A0        |                                   |
| P0C7T6        |                                   |
| P10107        |                                   |

**P10630** GO\_0003727;GO\_0004386;

P10852

P11260

P11499

P11928

P14148

P14576

P16254

P16330

P16381

P17225

P17433

P19426

P20152

P21570

P22561

P23949

P24547

P25444

P26041

P26369

P27048

P28352

P28659

P29341

P31230

P32067

P35550

P35922

P35979

P40764

P47199

P47962

P49312

P49962

P50580

P52196

**P52912**

P53026

P53996

P54823

P56959

P57722

|               |             |
|---------------|-------------|
| P57724        |             |
| P57784        |             |
| P59708        |             |
| P60322        |             |
| P60324        |             |
| P60335        |             |
| <b>P60824</b> | GO_0003727; |
| P60843        |             |
| P60867        |             |
| P61327        |             |
| P61979        |             |
| P62264        |             |
| P62270        |             |
| P62281        |             |
| P62305        |             |
| P62307        |             |
| P62309        |             |
| P62311        |             |
| P62313        |             |
| P62320        |             |
| P62322        |             |
| P62488        |             |
| P62702        |             |
| P62751        |             |
| P62843        |             |
| P62908        |             |
| P62918        |             |
| P62960        |             |
| P62996        |             |
| P63038        |             |
| P63058        |             |
| P63073        |             |
| P63154        |             |
| P63158        |             |
| P63163        |             |
| P63242        |             |
| <b>P63271</b> | GO_0003727; |
| P67984        |             |
| <b>P68372</b> | GO_0003725; |
| P70122        |             |
| P70166        |             |
| P70279        |             |
| P70318        |             |

|               |                        |
|---------------|------------------------|
| P70333        |                        |
| P70372        |                        |
| <b>P84104</b> | GO_0003727;            |
| P85965        |                        |
| P86049        |                        |
| P97343        |                        |
| P97379        |                        |
| P97440        |                        |
| P97461        |                        |
| P97473        |                        |
| P97770        |                        |
| P97801        |                        |
| P97855        |                        |
| Q00899        |                        |
| Q03160        |                        |
| Q03963        |                        |
| Q05921        |                        |
| Q05A36        |                        |
| <b>Q05BJ7</b> | GO_0003725;            |
| <b>Q05BR6</b> | GO_0003725;GO_0004386; |
| Q05CL8        |                        |
| Q149F1        |                        |
| Q14A90        |                        |
| Q14AI6        |                        |
| <b>Q14AZ4</b> | GO_0003725;            |
| Q14BH3        |                        |
| Q14C51        |                        |
| Q3T997        |                        |
| <b>Q3T9H2</b> | GO_0003725;            |
| Q3TEB2        |                        |
| <b>Q3THJ3</b> | GO_0003725;            |
| Q3TJ07        |                        |
| Q3TU43        |                        |
| Q3TWA1        |                        |
| Q3TWP5        |                        |
| Q3TX08        |                        |
| Q3TZX8        |                        |
| Q3U0V1        |                        |
| Q3U5F4        |                        |
| Q3U7A6        |                        |
| Q3U8D3        |                        |
| Q3U9C4        |                        |
| Q3UBZ5        |                        |

|               |                        |
|---------------|------------------------|
| Q3UD30        |                        |
| Q3UDH2        |                        |
| Q3UE17        |                        |
| Q3UEB3        |                        |
| Q3UK98        |                        |
| Q3UKG1        |                        |
| Q3UKX3        |                        |
| Q3UMQ8        |                        |
| Q3UNH9        |                        |
| <b>Q3UR42</b> | GO_0003725;GO_0004386; |
| Q3URQ7        |                        |
| Q3US41        |                        |
| Q3UTA9        |                        |
| Q3UTC8        |                        |
| Q3UUK2        |                        |
| Q3UUV8        |                        |
| Q3UWR2        |                        |
| Q3UWZ6        |                        |
| <b>Q3UXA2</b> | GO_0003725;            |
| <b>Q3UY54</b> | GO_0003727;            |
| Q3UZ01        |                        |
| Q3V188        |                        |
| Q45KJ6        |                        |
| Q45VK5        |                        |
| Q45VK6        |                        |
| Q4FJV4        |                        |
| <b>Q4FZF3</b> | GO_0004386;            |
| Q4KL78        |                        |
| Q501J6        |                        |
| Q505F5        |                        |
| Q52KJ2        |                        |
| Q569X3        |                        |
| Q58EV5        |                        |
| Q5F2A7        |                        |
| <b>Q5F2E7</b> | GO_0003725;            |
| Q5FWJ3        |                        |
| <b>Q5J3Q7</b> | GO_0003725;            |
| <b>Q5J4D4</b> | GO_0003725;            |
| <b>Q5J4D5</b> | GO_0003725;            |
| Q5NCR9        |                        |
| Q5ND52        |                        |
| Q5QJQ9        |                        |
| <b>Q5SF07</b> |                        |

**Q5SUE7**

Q5U4D9

**Q5XFR0** GO\_0003727;

**Q5YD48** GO\_0003727;

**Q60668** GO\_0003727;

Q60710

Q60749

Q60856

Q60865

**Q60899**

Q60900

Q60990

Q61066

Q61183

**Q61474** GO\_0003725;

Q61545

Q61584

Q61655

Q61656

Q61701

Q61823

Q61937

Q61990

Q62093

Q62095

Q62167

Q62176

Q62189

Q62191

Q62241

Q62348

Q62376

Q62377

Q64012

Q641P2

Q64213

Q64282

Q64368

Q64707

Q69Z36

Q6A0A2

Q6A0D4

Q6NVF9

|               |                        |
|---------------|------------------------|
| Q6NXK5        |                        |
| Q6P3D0        |                        |
| Q6P9R1        |                        |
| <b>Q6PB89</b> | GO_0003727;            |
| <b>Q6PCL9</b> |                        |
| <b>Q6PDM2</b> | GO_0003725;GO_0003727; |
| <b>Q6PEE2</b> | GO_0004386;            |
| Q6PFR5        |                        |
| Q6TNG5        |                        |
| Q6VY05        |                        |
| Q6ZPL9        |                        |
| Q6ZWM4        |                        |
| Q6ZWN5        |                        |
| Q6ZWX6        |                        |
| Q71LX8        |                        |
| Q78E06        |                        |
| Q7TMF2        |                        |
| Q7TMK9        |                        |
| Q7TMY4        |                        |
| Q7TN33        |                        |
| Q7TN98        |                        |
| Q7TN99        |                        |
| Q7TND5        |                        |
| <b>Q7TPD6</b> |                        |
| <b>Q7TPY2</b> |                        |
| <b>Q7TQC5</b> | GO_0003725;            |
| <b>Q7TQK4</b> |                        |
| Q7TS68        |                        |
| <b>Q7TSY6</b> |                        |
| <b>Q80UU5</b> | GO_0003725;            |
| <b>Q80VC6</b> | GO_0003725;            |
| Q80VL1        |                        |
| <b>Q80VT1</b> |                        |
| Q80W37        |                        |
| Q80WJ7        |                        |
| Q80WS3        |                        |
| Q80WY3        |                        |
| Q80X85        |                        |
| Q80Y20        |                        |
| Q80YT9        |                        |
| <b>Q811K8</b> | GO_0003727;            |
| <b>Q812E0</b> |                        |
| <b>Q8BG05</b> |                        |

|               |             |
|---------------|-------------|
| Q8BG17        |             |
| Q8BG81        |             |
| Q8BGA5        |             |
| <b>Q8BGD9</b> |             |
| Q8BGJ9        |             |
| <b>Q8BGT7</b> |             |
| <b>Q8BGW5</b> |             |
| Q8BGY2        |             |
| <b>Q8BHD7</b> |             |
| Q8BHN5        |             |
| Q8BHS3        |             |
| <b>Q8BI72</b> |             |
| Q8BIF2        |             |
| Q8BIQ5        |             |
| <b>Q8BJ05</b> |             |
| <b>Q8BKA3</b> | GO_0003725; |
| <b>Q8BKS9</b> |             |
| <b>Q8BKT7</b> |             |
| Q8BL97        |             |
| Q8BM30        |             |
| <b>Q8BMA6</b> | GO_0003725; |
| Q8BMB3        |             |
| <b>Q8BMC4</b> |             |
| <b>Q8BN59</b> |             |
| Q8BNV1        |             |
| Q8BP71        |             |
| <b>Q8BQZ3</b> | GO_0003727; |
| Q8BQZ5        |             |
| Q8BT14        |             |
| <b>Q8BTF8</b> | GO_0003727; |
| <b>Q8BTV2</b> |             |
| <b>Q8BTW3</b> |             |
| <b>Q8BUV6</b> |             |
| <b>Q8BVL9</b> | GO_0003727; |
| <b>Q8BVN4</b> |             |
| <b>Q8BWL5</b> |             |
| Q8BWW4        |             |
| Q8BY02        |             |
| <b>Q8BYL4</b> |             |
| <b>Q8BZ06</b> | GO_0003725; |
| <b>Q8C0D0</b> |             |
| Q8C181        |             |
| <b>Q8C2Q3</b> |             |

|               |             |
|---------------|-------------|
| Q8C2W3        |             |
| <b>Q8C3P7</b> |             |
| <b>Q8C551</b> |             |
| <b>Q8C5B7</b> |             |
| Q8C5L7        |             |
| <b>Q8C5Q4</b> |             |
| <b>Q8C7E9</b> |             |
| <b>Q8C7Q4</b> |             |
| <b>Q8C854</b> |             |
| Q8C9A2        |             |
| Q8CAE2        |             |
| <b>Q8CB98</b> |             |
| <b>Q8CCF0</b> |             |
| <b>Q8CCS6</b> | GO_0003727; |
| <b>Q8CE46</b> |             |
| <b>Q8CH02</b> |             |
| <b>Q8CH72</b> |             |
| Q8CIN6        |             |
| Q8CJ67        |             |
| <b>Q8CJ74</b> | GO_0003725; |
| <b>Q8JZV4</b> |             |
| Q8JZX4        |             |
| <b>Q8K0G8</b> |             |
| <b>Q8K1J6</b> |             |
| <b>Q8K234</b> | GO_0003727; |
| <b>Q8K2D3</b> |             |
| <b>Q8K2F8</b> |             |
| <b>Q8K2X2</b> | GO_0003727; |
| <b>Q8K301</b> |             |
| Q8K339        |             |
| <b>Q8K363</b> |             |
| Q8K3L4        |             |
| Q8K3L5        |             |
| <b>Q8K3P5</b> |             |
| <b>Q8K3W3</b> |             |
| Q8K3Y3        |             |
| <b>Q8K465</b> | GO_0003725; |
| <b>Q8K469</b> | GO_0003725; |
| <b>Q8K4B5</b> | GO_0003725; |
| Q8K4E6        |             |
| Q8K4E7        |             |
| Q8K4E8        |             |
| Q8K4E9        |             |

|               |             |
|---------------|-------------|
| <b>Q8QZX5</b> |             |
| Q8QZY9        |             |
| <b>Q8R081</b> |             |
| Q8R0F5        |             |
| <b>Q8R316</b> |             |
| Q8R326        |             |
| Q8R3G1        |             |
| Q8R3J4        |             |
| Q8R3N6        |             |
| Q8VBV3        |             |
| <b>Q8VC51</b> | GO_0003725; |
| <b>Q8VC70</b> | GO_0003725; |
| Q8VC85        |             |
| Q8VCZ8        |             |
| <b>Q8VDG3</b> |             |
| <b>Q8VDS3</b> | GO_0003727; |
| Q8VE62        |             |
| <b>Q8VE80</b> |             |
| Q8VE92        |             |
| <b>Q8VE97</b> | GO_0003725; |
| Q8VEH7        |             |
| Q8VH51        |             |
| Q8VHT7        |             |
| <b>Q8VHZ7</b> |             |
| <b>Q8VI94</b> | GO_0003727; |
| <b>Q8VI95</b> | GO_0003725; |
| Q8VI96        |             |
| Q8VI97        |             |
| <b>Q8VIJ6</b> |             |
| <b>Q91V81</b> |             |
| <b>Q91VC3</b> |             |
| <b>Q91VE6</b> |             |
| Q91VI2        |             |
| Q91VM5        |             |
| <b>Q91VN6</b> |             |
| <b>Q91VR5</b> |             |
| Q91W18        |             |
| Q91W45        |             |
| <b>Q91W59</b> |             |
| Q91WE3        |             |
| Q91WG3        |             |
| Q91WJ8        |             |
| <b>Q91WM1</b> |             |

**Q91WM3**

Q91WQ3

Q91WT4

Q91WT8

**Q91YM7**

Q91YN2

**Q91YQ3**

**Q91Z31**

**Q91Z49**

**Q91ZS8**

**Q920Q6**

Q921F0

**Q921F2**

Q921F4

**Q921I9**

**Q921Y2**

**Q924M5**

Q924S2

**Q99020** GO\_0003727;

Q99J10

Q99J25

**Q99J36**

Q99J64

**Q99J87**

**Q99JX7** GO\_0003725;

**Q99K48**

Q99KR3

Q99LX0

Q99M28

**Q99MJ9**

**Q99N87** GO\_0003727;

Q99N96

**Q9CPN8** GO\_0003725;

Q9CPS7

Q9CQ21

Q9CQ49

**Q9CQ61**

**Q9CQE3** GO\_0003727;

**Q9CQF3**

Q9CQF4

Q9CQI7

Q9CQK3

Q9CQL1

|               |             |
|---------------|-------------|
| <b>Q9CQL5</b> |             |
| Q9CQQ8        |             |
| Q9CQS7        |             |
| Q9CQT2        |             |
| Q9CQY2        |             |
| Q9CR08        |             |
| Q9CR83        |             |
| Q9CR86        |             |
| <b>Q9CRA8</b> |             |
| Q9CRB2        |             |
| <b>Q9CTG2</b> | GO_0003725; |
| Q9CVW0        |             |
| <b>Q9CW46</b> |             |
| <b>Q9CWE6</b> | GO_0003727; |
| <b>Q9CWT6</b> | GO_0004386; |
| Q9CWU5        |             |
| <b>Q9CWV6</b> |             |
| <b>Q9CWX4</b> |             |
| <b>Q9CWX9</b> |             |
| <b>Q9CXY8</b> |             |
| <b>Q9CWZ3</b> | GO_0003727; |
| <b>Q9CX86</b> |             |
| <b>Q9CXG3</b> |             |
| Q9CXJ1        |             |
| Q9CXK8        |             |
| <b>Q9CXW4</b> |             |
| <b>Q9CXY6</b> | GO_0003725; |
| Q9CY57        |             |
| <b>Q9CY58</b> |             |
| Q9CY66        |             |
| <b>Q9CY73</b> |             |
| Q9CYC6        |             |
| Q9CZ96        |             |
| Q9CZB3        |             |
| Q9CZU4        |             |
| Q9CZX5        |             |
| Q9D0B0        |             |
| <b>Q9D0D3</b> |             |
| <b>Q9D0D4</b> |             |
| <b>Q9D0E1</b> | GO_0003725; |
| Q9D0L8        |             |
| <b>Q9D0M0</b> |             |
| <b>Q9D0R4</b> |             |

|               |             |
|---------------|-------------|
| Q9D0T1        |             |
| <b>Q9D1C9</b> |             |
| Q9D1J3        |             |
| Q9D1N9        |             |
| Q9D1Q1        |             |
| Q9D384        |             |
| <b>Q9D3U0</b> |             |
| Q9D5P4        |             |
| Q9D6V8        |             |
| Q9D753        |             |
| Q9D7A6        |             |
| <b>Q9D7B1</b> |             |
| Q9D823        |             |
| <b>Q9D824</b> |             |
| Q9D883        |             |
| Q9D8T7        |             |
| <b>Q9D8Z1</b> |             |
| <b>Q9DAA6</b> |             |
| <b>Q9DAT5</b> |             |
| <b>Q9DB27</b> |             |
| Q9DBB5        |             |
| Q9DBE7        |             |
| Q9DBN9        |             |
| <b>Q9DBY5</b> | GO_0003727; |
| <b>Q9ERI5</b> | GO_0003727; |
| Q9ESX4        |             |
| <b>Q9ESX5</b> |             |
| Q9JHI2        |             |
| Q9JHI7        |             |
| Q9JHS9        |             |
| <b>Q9JI20</b> | GO_0003727; |
| <b>Q9JI38</b> |             |
| Q9JII5        |             |
| Q9JJ43        |             |
| Q9JJ48        |             |
| <b>Q9JJT9</b> | GO_0003727; |
| Q9JJW6        |             |
| Q9JKB3        |             |
| <b>Q9JKN6</b> |             |
| <b>Q9JKP5</b> |             |
| Q9JL16        |             |
| Q9JLZ3        |             |
| <b>Q9QUM9</b> |             |

|               |                        |
|---------------|------------------------|
| <b>Q9QXA5</b> |                        |
| <b>Q9QXK7</b> |                        |
| Q9QXV1        |                        |
| <b>Q9QXX8</b> | GO_0003725;            |
| Q9QY15        |                        |
| Q9QY24        |                        |
| Q9QYL7        |                        |
| Q9QYS9        |                        |
| Q9QZH3        |                        |
| Q9R020        |                        |
| <b>Q9R0B7</b> |                        |
| <b>Q9R0U0</b> | GO_0003727;            |
| <b>Q9R226</b> |                        |
| Q9WTX2        |                        |
| <b>Q9WU01</b> |                        |
| Q9WU56        |                        |
| <b>Q9WUA2</b> |                        |
| Q9WUK2        |                        |
| Q9WV02        |                        |
| <b>Q9WVB0</b> |                        |
| <b>Q9WVP6</b> |                        |
| <b>Q9WVR4</b> |                        |
| <b>Q9Z0H4</b> |                        |
| <b>Q9Z108</b> |                        |
| Q9Z120        |                        |
| <b>Q9Z130</b> | GO_0003727;            |
| Q9Z199        |                        |
| <b>Q9Z1D1</b> | GO_0003725;GO_0004386; |
| <b>Q9Z1N5</b> | GO_0003727;GO_0004386; |
| <b>Q9Z204</b> |                        |
| <b>Q9Z2C8</b> |                        |
| Q9Z2F2        |                        |
| Q9Z2X1        |                        |
| V5IRT6        |                        |
| V9GX87        |                        |
