# Supplementary material for: CROSSalive : a web server for predicting the in vivo structure of RNA molecules
Source: Oxford University Press journal article supplement (doi:10.1093/bioinformatics/btz666), 2019-08-27
Supplement: bioinformatics_36_3_940_s2.zip [file bioinformatics_36_3_940_s2.zip › supplementary-table-s2.xlsx]

## Sheet: Sheet1
A0A0J9YUD8
A0A0J9YUZ4
A0A0J9YV17	GO_0003725;
A0A0J9YV76	GO_0003725;
A0A0R4J2C3	GO_0003725;GO_0004386;
A0A0U1RP30
A0A0U1RP90
A0A0U1RPG3
A0A1B0GS40
A0A1L1SQR7
A0A1L1SU19
A2A5R8
A2A5S3
A2ADA5
A2AHI8
A2ARM1
A2BH69
A2RSY6
B2RQL4
D3YVC6
D3YXB2
D3YXD3
D3YY71
D3YYK4	GO_0003727;
D3YZ18
D3YZ76
D3YZS5
D3Z282
D3Z324
D3Z329
D3Z352
D3Z3B3	GO_0003727;
D3Z461
D3Z4I3
D3Z5F6	GO_0003727;
D3Z6D2
D6RCY4
D6RE49
D6RGR9
E0CXP1
E0CY94
E0CYH6
E0CYN4
E0CZ32
E0CZD3
E2QRQ3
E9PYN2
E9Q326	GO_0003725;
E9Q7N8
E9Q9A9
F6VMV6
F6WJA6	GO_0003727;
F6X2V9
F6Y3A6
F7ATT9
F7CFL3
F7CTY2
F7CXR7
F8WHN2	GO_0003727;
F8WI80
G3X9Q0
G8JL83
H3BK45	GO_0003727;
H9KV02
O08583
O08795
O08848
O35130
O35326
O35473
O35698
O35737
O35900
O54724
O54836
O55055	GO_0003725;
O55187	GO_0003727;
O88477
O88569
O89086
P00375	GO_0003725;GO_0003727;GO_0004386;
P05213
P09405
P0C7A0
P0C7T6
P10107
P10630	GO_0003727;GO_0004386;
P10852
P11260
P11499
P11928
P14148
P14576
P16254
P16330
P16381
P17225
P17433
P19426
P20152
P21570
P22561
P23949
P24547
P25444
P26041
P26369
P27048
P28352
P28659
P29341
P31230
P32067
P35550
P35922
P35979
P40764
P47199
P47962
P49312
P49962
P50580
P52196
P52912
P53026
P53996
P54823
P56959
P57722
P57724
P57784
P59708
P60322
P60324
P60335
P60824	GO_0003727;
P60843
P60867
P61327
P61979
P62264
P62270
P62281
P62305
P62307
P62309
P62311
P62313
P62320
P62322
P62488
P62702
P62751
P62843
P62908
P62918
P62960
P62996
P63038
P63058
P63073
P63154
P63158
P63163
P63242
P63271	GO_0003727;
P67984
P68372	GO_0003725;
P70122
P70166
P70279
P70318
P70333
P70372
P84104	GO_0003727;
P85965
P86049
P97343
P97379
P97440
P97461
P97473
P97770
P97801
P97855
Q00899
Q03160
Q03963
Q05921
Q05A36
Q05BJ7	GO_0003725;
Q05BR6	GO_0003725;GO_0004386;
Q05CL8
Q149F1
Q14A90
Q14AI6
Q14AZ4	GO_0003725;
Q14BH3
Q14C51
Q3T997
Q3T9H2	GO_0003725;
Q3TEB2
Q3THJ3	GO_0003725;
Q3TJ07
Q3TU43
Q3TWA1
Q3TWP5
Q3TX08
Q3TZX8
Q3U0V1
Q3U5F4
Q3U7A6
Q3U8D3
Q3U9C4
Q3UBZ5
Q3UD30
Q3UDH2
Q3UE17
Q3UEB3
Q3UK98
Q3UKG1
Q3UKX3
Q3UMQ8
Q3UNH9
Q3UR42	GO_0003725;GO_0004386;
Q3URQ7
Q3US41
Q3UTA9
Q3UTC8
Q3UUK2
Q3UUV8
Q3UWR2
Q3UWZ6
Q3UXA2	GO_0003725;
Q3UY54	GO_0003727;
Q3UZ01
Q3V188
Q45KJ6
Q45VK5
Q45VK6
Q4FJV4
Q4FZF3	GO_0004386;
Q4KL78
Q501J6
Q505F5
Q52KJ2
Q569X3
Q58EV5
Q5F2A7
Q5F2E7	GO_0003725;
Q5FWJ3
Q5J3Q7	GO_0003725;
Q5J4D4	GO_0003725;
Q5J4D5	GO_0003725;
Q5NCR9
Q5ND52
Q5QJQ9
Q5SF07
Q5SUE7
Q5U4D9
Q5XFR0	GO_0003727;
Q5YD48	GO_0003727;
Q60668	GO_0003727;
Q60710
Q60749
Q60856
Q60865
Q60899
Q60900
Q60990
Q61066
Q61183
Q61474	GO_0003725;
Q61545
Q61584
Q61655
Q61656
Q61701
Q61823
Q61937
Q61990
Q62093
Q62095
Q62167
Q62176
Q62189
Q62191
Q62241
Q62348
Q62376
Q62377
Q64012
Q641P2
Q64213
Q64282
Q64368
Q64707
Q69Z36
Q6A0A2
Q6A0D4
Q6NVF9
Q6NXK5
Q6P3D0
Q6P9R1
Q6PB89	GO_0003727;
Q6PCL9
Q6PDM2	GO_0003725;GO_0003727;
Q6PEE2	GO_0004386;
Q6PFR5
Q6TNG5
Q6VY05
Q6ZPL9
Q6ZWM4
Q6ZWN5
Q6ZWX6
Q71LX8
Q78E06
Q7TMF2
Q7TMK9
Q7TMY4
Q7TN33
Q7TN98
Q7TN99
Q7TND5
Q7TPD6
Q7TPY2
Q7TQC5	GO_0003725;
Q7TQK4
Q7TS68
Q7TSY6
Q80UU5	GO_0003725;
Q80VC6	GO_0003725;
Q80VL1
Q80VT1
Q80W37
Q80WJ7
Q80WS3
Q80WY3
Q80X85
Q80Y20
Q80YT9
Q811K8	GO_0003727;
Q812E0
Q8BG05
Q8BG17
Q8BG81
Q8BGA5
Q8BGD9
Q8BGJ9
Q8BGT7
Q8BGW5
Q8BGY2
Q8BHD7
Q8BHN5
Q8BHS3
Q8BI72
Q8BIF2
Q8BIQ5
Q8BJ05
Q8BKA3	GO_0003725;
Q8BKS9
Q8BKT7
Q8BL97
Q8BM30
Q8BMA6	GO_0003725;
Q8BMB3
Q8BMC4
Q8BN59
Q8BNV1
Q8BP71
Q8BQZ3	GO_0003727;
Q8BQZ5
Q8BT14
Q8BTF8	GO_0003727;
Q8BTV2
Q8BTW3
Q8BUV6
Q8BVL9	GO_0003727;
Q8BVN4
Q8BWL5
Q8BWW4
Q8BY02
Q8BYL4
Q8BZ06	GO_0003725;
Q8C0D0
Q8C181
Q8C2Q3
Q8C2W3
Q8C3P7
Q8C551
Q8C5B7
Q8C5L7
Q8C5Q4
Q8C7E9
Q8C7Q4
Q8C854
Q8C9A2
Q8CAE2
Q8CB98
Q8CCF0
Q8CCS6	GO_0003727;
Q8CE46
Q8CH02
Q8CH72
Q8CIN6
Q8CJ67
Q8CJ74	GO_0003725;
Q8JZV4
Q8JZX4
Q8K0G8
Q8K1J6
Q8K234	GO_0003727;
Q8K2D3
Q8K2F8
Q8K2X2	GO_0003727;
Q8K301
Q8K339
Q8K363
Q8K3L4
Q8K3L5
Q8K3P5
Q8K3W3
Q8K3Y3
Q8K465	GO_0003725;
Q8K469	GO_0003725;
Q8K4B5	GO_0003725;
Q8K4E6
Q8K4E7
Q8K4E8
Q8K4E9
Q8QZX5
Q8QZY9
Q8R081
Q8R0F5
Q8R316
Q8R326
Q8R3G1
Q8R3J4
Q8R3N6
Q8VBV3
Q8VC51	GO_0003725;
Q8VC70	GO_0003725;
Q8VC85
Q8VCZ8
Q8VDG3
Q8VDS3	GO_0003727;
Q8VE62
Q8VE80
Q8VE92
Q8VE97	GO_0003725;
Q8VEH7
Q8VH51
Q8VHT7
Q8VHZ7
Q8VI94	GO_0003727;
Q8VI95	GO_0003725;
Q8VI96
Q8VI97
Q8VIJ6
Q91V81
Q91VC3
Q91VE6
Q91VI2
Q91VM5
Q91VN6
Q91VR5
Q91W18
Q91W45
Q91W59
Q91WE3
Q91WG3
Q91WJ8
Q91WM1
Q91WM3
Q91WQ3
Q91WT4
Q91WT8
Q91YM7
Q91YN2
Q91YQ3
Q91Z31
Q91Z49
Q91ZS8
Q920Q6
Q921F0
Q921F2
Q921F4
Q921I9
Q921Y2
Q924M5
Q924S2
Q99020	GO_0003727;
Q99J10
Q99J25
Q99J36
Q99J64
Q99J87
Q99JX7	GO_0003725;
Q99K48
Q99KR3
Q99LX0
Q99M28
Q99MJ9
Q99N87	GO_0003727;
Q99N96
Q9CPN8	GO_0003725;
Q9CPS7
Q9CQ21
Q9CQ49
Q9CQ61
Q9CQE3	GO_0003727;
Q9CQF3
Q9CQF4
Q9CQI7
Q9CQK3
Q9CQL1
Q9CQL5
Q9CQQ8
Q9CQS7
Q9CQT2
Q9CQY2
Q9CR08
Q9CR83
Q9CR86
Q9CRA8
Q9CRB2
Q9CTG2	GO_0003725;
Q9CVW0
Q9CW46
Q9CWE6	GO_0003727;
Q9CWT6	GO_0004386;
Q9CWU5
Q9CWV6
Q9CWX4
Q9CWX9
Q9CWY8
Q9CWZ3	GO_0003727;
Q9CX86
Q9CXG3
Q9CXJ1
Q9CXK8
Q9CXW4
Q9CXY6	GO_0003725;
Q9CY57
Q9CY58
Q9CY66
Q9CY73
Q9CYC6
Q9CZ96
Q9CZB3
Q9CZU4
Q9CZX5
Q9D0B0
Q9D0D3
Q9D0D4
Q9D0E1	GO_0003725;
Q9D0L8
Q9D0M0
Q9D0R4
Q9D0T1
Q9D1C9
Q9D1J3
Q9D1N9
Q9D1Q1
Q9D384
Q9D3U0
Q9D5P4
Q9D6V8
Q9D753
Q9D7A6
Q9D7B1
Q9D823
Q9D824
Q9D883
Q9D8T7
Q9D8Z1
Q9DAA6
Q9DAT5
Q9DB27
Q9DBB5
Q9DBE7
Q9DBN9
Q9DBY5	GO_0003727;
Q9ERI5	GO_0003727;
Q9ESX4
Q9ESX5
Q9JHI2
Q9JHI7
Q9JHS9
Q9JI20	GO_0003727;
Q9JI38
Q9JII5
Q9JJ43
Q9JJ48
Q9JJT9	GO_0003727;
Q9JJW6
Q9JKB3
Q9JKN6
Q9JKP5
Q9JL16
Q9JLZ3
Q9QUM9
Q9QXA5
Q9QXK7
Q9QXV1
Q9QXX8	GO_0003725;
Q9QY15
Q9QY24
Q9QYL7
Q9QYS9
Q9QZH3
Q9R020
Q9R0B7
Q9R0U0	GO_0003727;
Q9R226
Q9WTX2
Q9WU01
Q9WU56
Q9WUA2
Q9WUK2
Q9WV02
Q9WVB0
Q9WVP6
Q9WVR4
Q9Z0H4
Q9Z108
Q9Z120
Q9Z130	GO_0003727;
Q9Z199
Q9Z1D1	GO_0003725;GO_0004386;
Q9Z1N5	GO_0003727;GO_0004386;
Q9Z204
Q9Z2C8
Q9Z2F2
Q9Z2X1
V5IRT6
V9GX87
