# Supplementary figures and images for: CROSSalive : a web server for predicting the in vivo structure of RNA molecules
Source: Oxford University Press journal article supplement (doi:10.1093/bioinformatics/btz666), 2019-08-27

Supplementary Figure 1

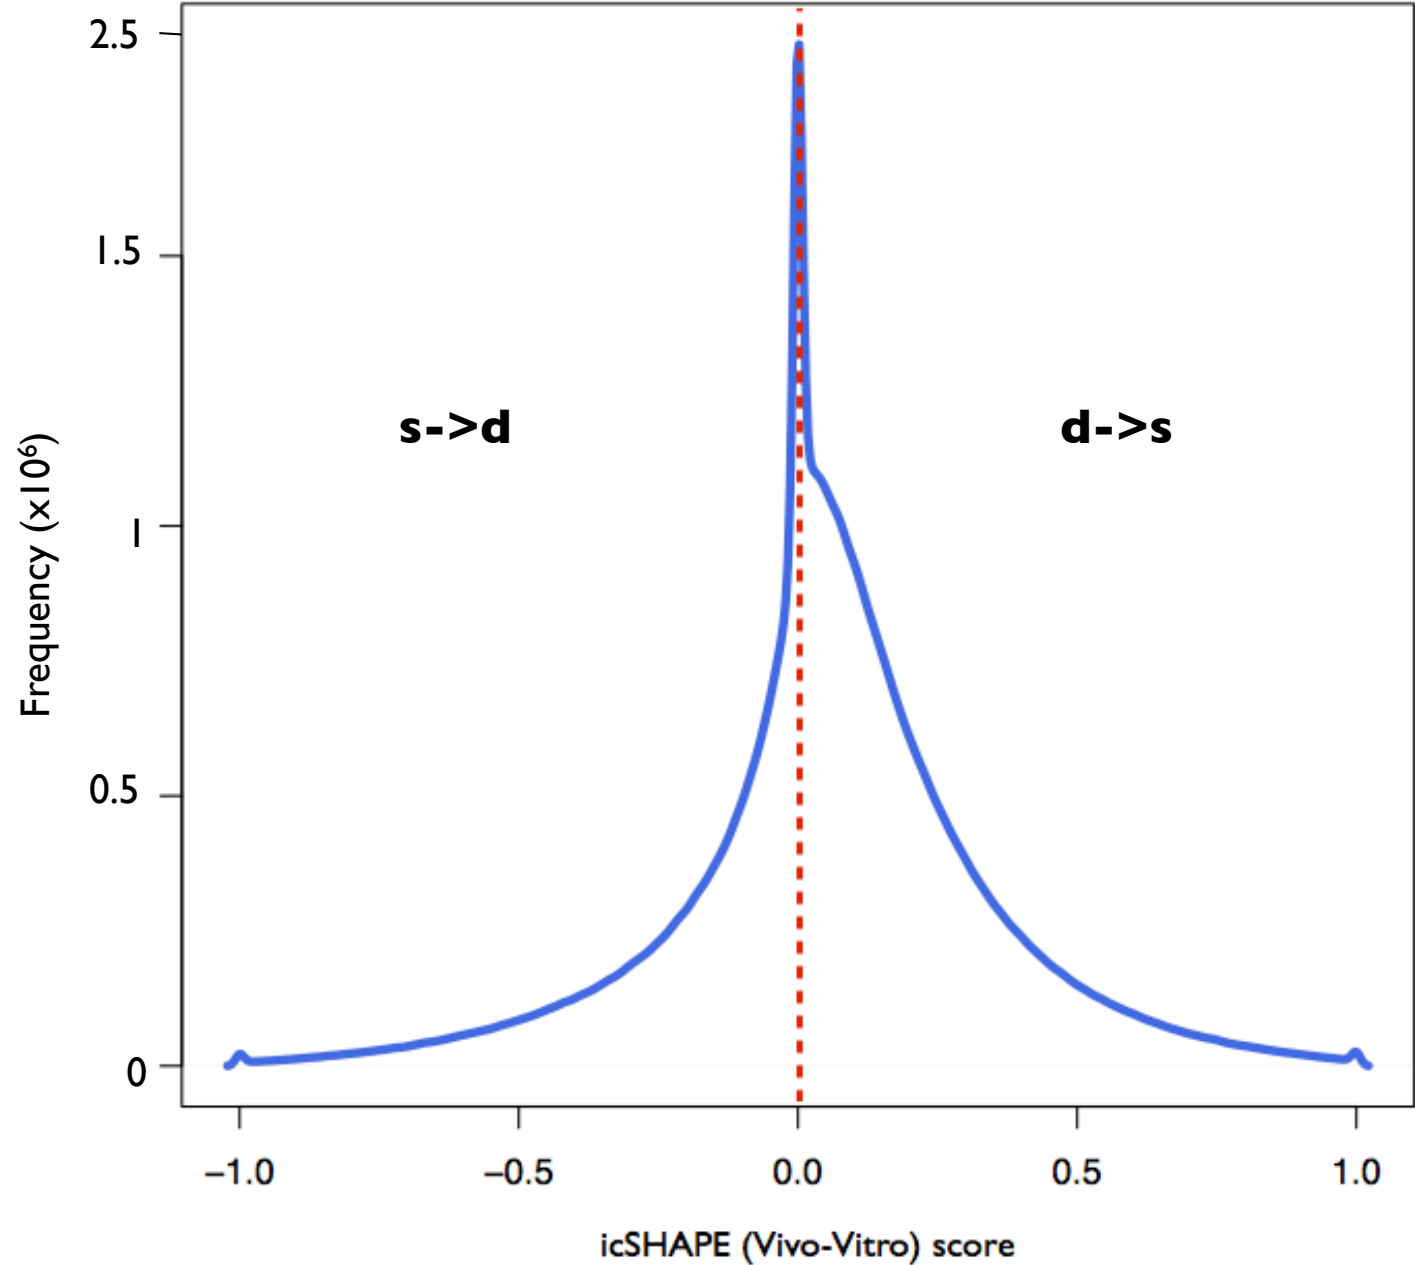

Supplementary Figure 2

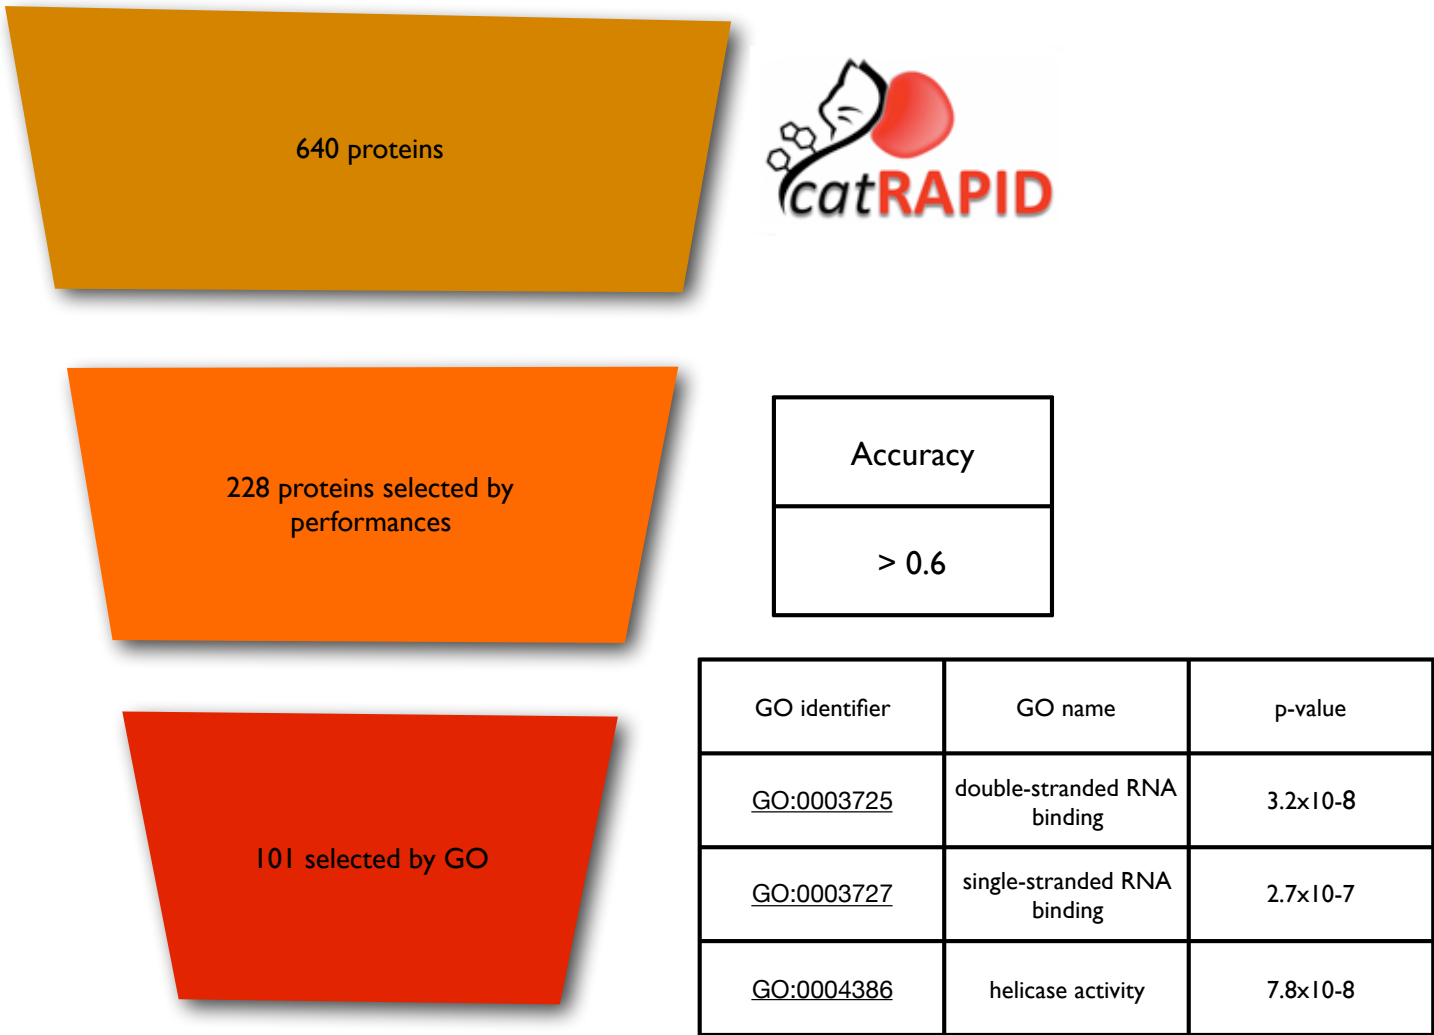

Supplementary Figure 3

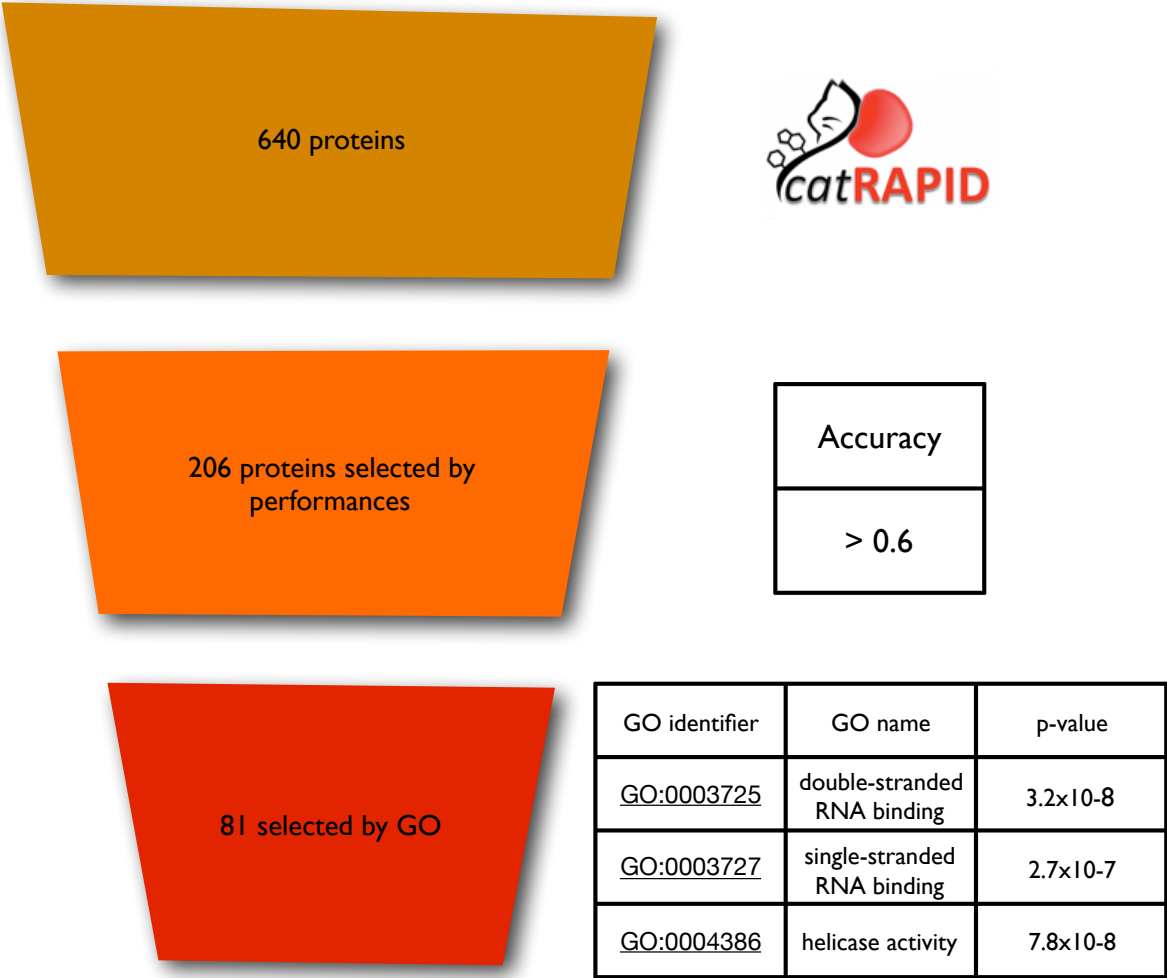

Supplementary Figure 4

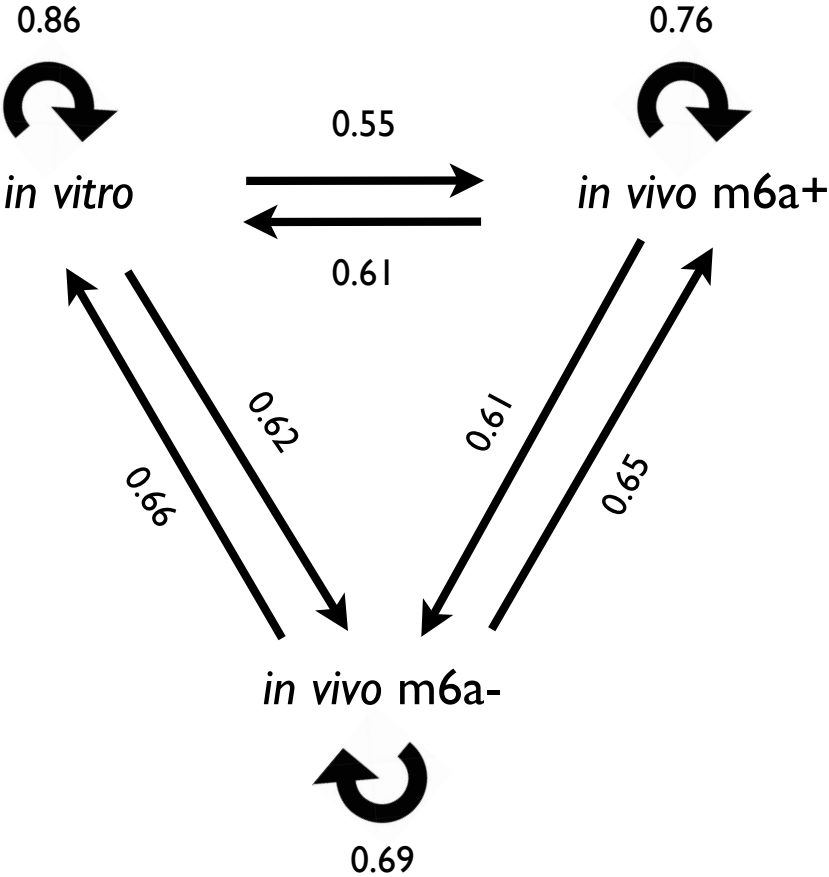

Supplement: bioinformatics_36_3_940_s2.zip [file bioinformatics_36_3_940_s2.zip]
